# Supplementary figures and images for: The effects of Cyclosporine A and azathioprine on human T cells activated by different costimulatory signals
Source: PubMed Central journal article supplement — Immunol Lett. 2011 Oct 30;140(1-2):74–80. doi: 10.1016/j.imlet.2011.06.010 (PMC3165200; doi:10.1016/j.imlet.2011.06.010), 2011-10-30

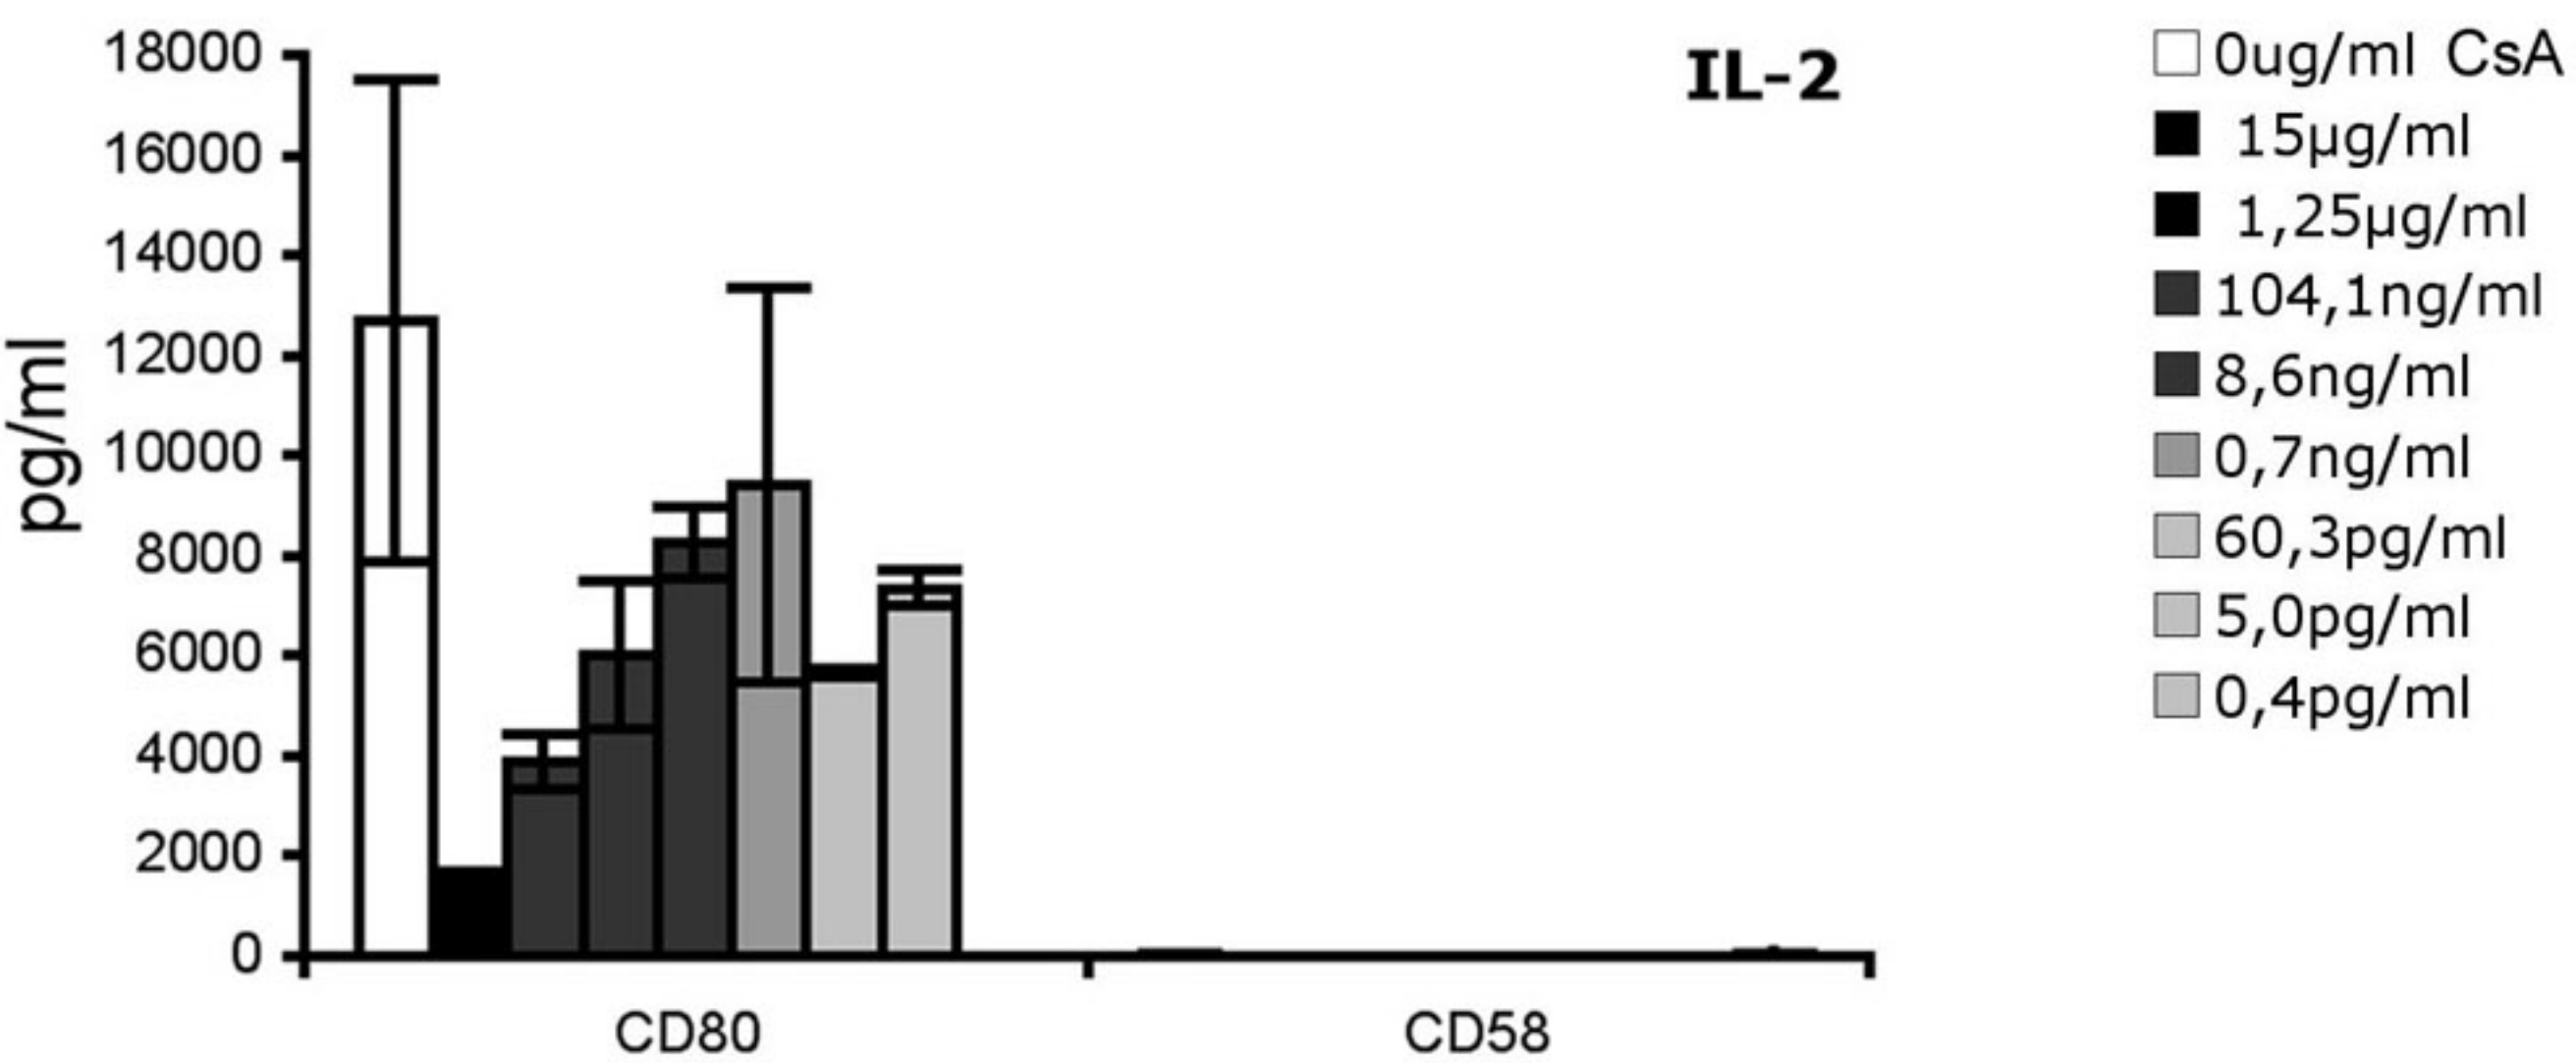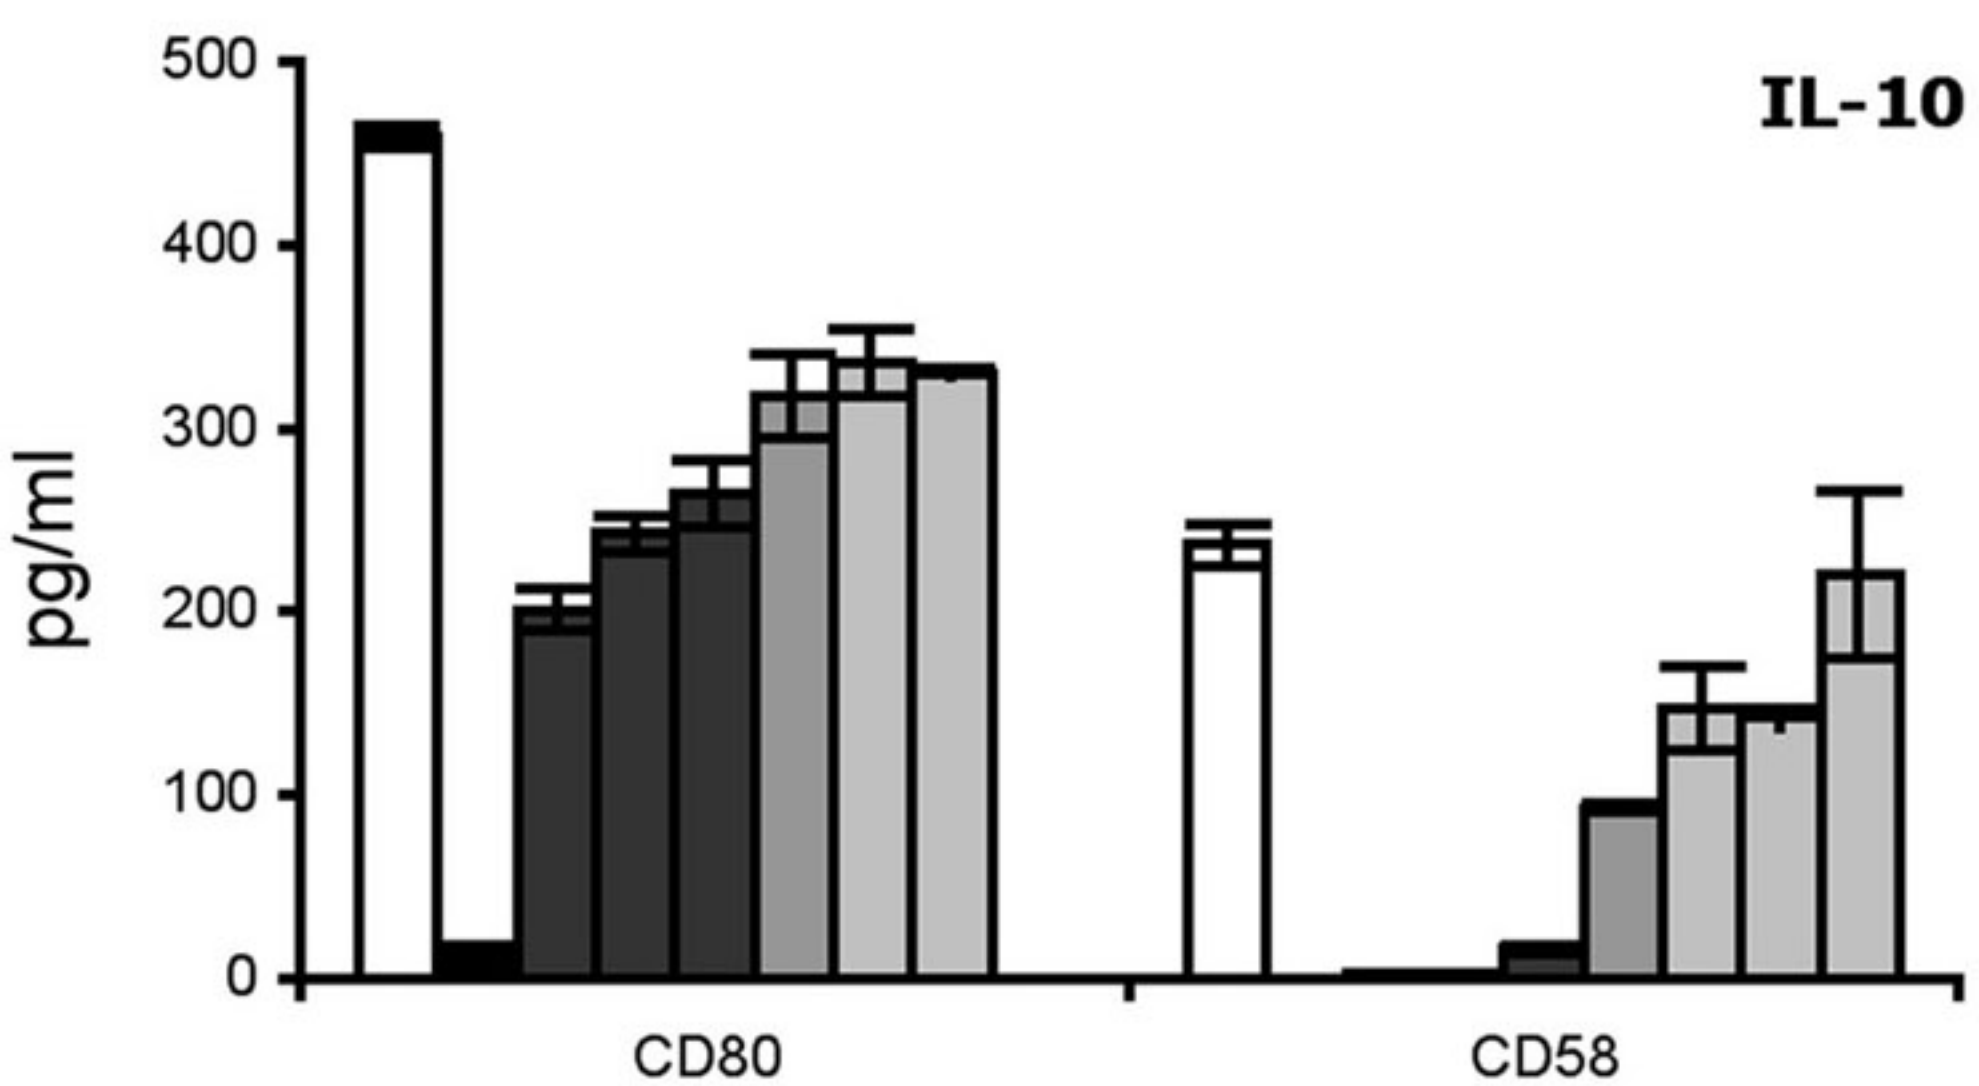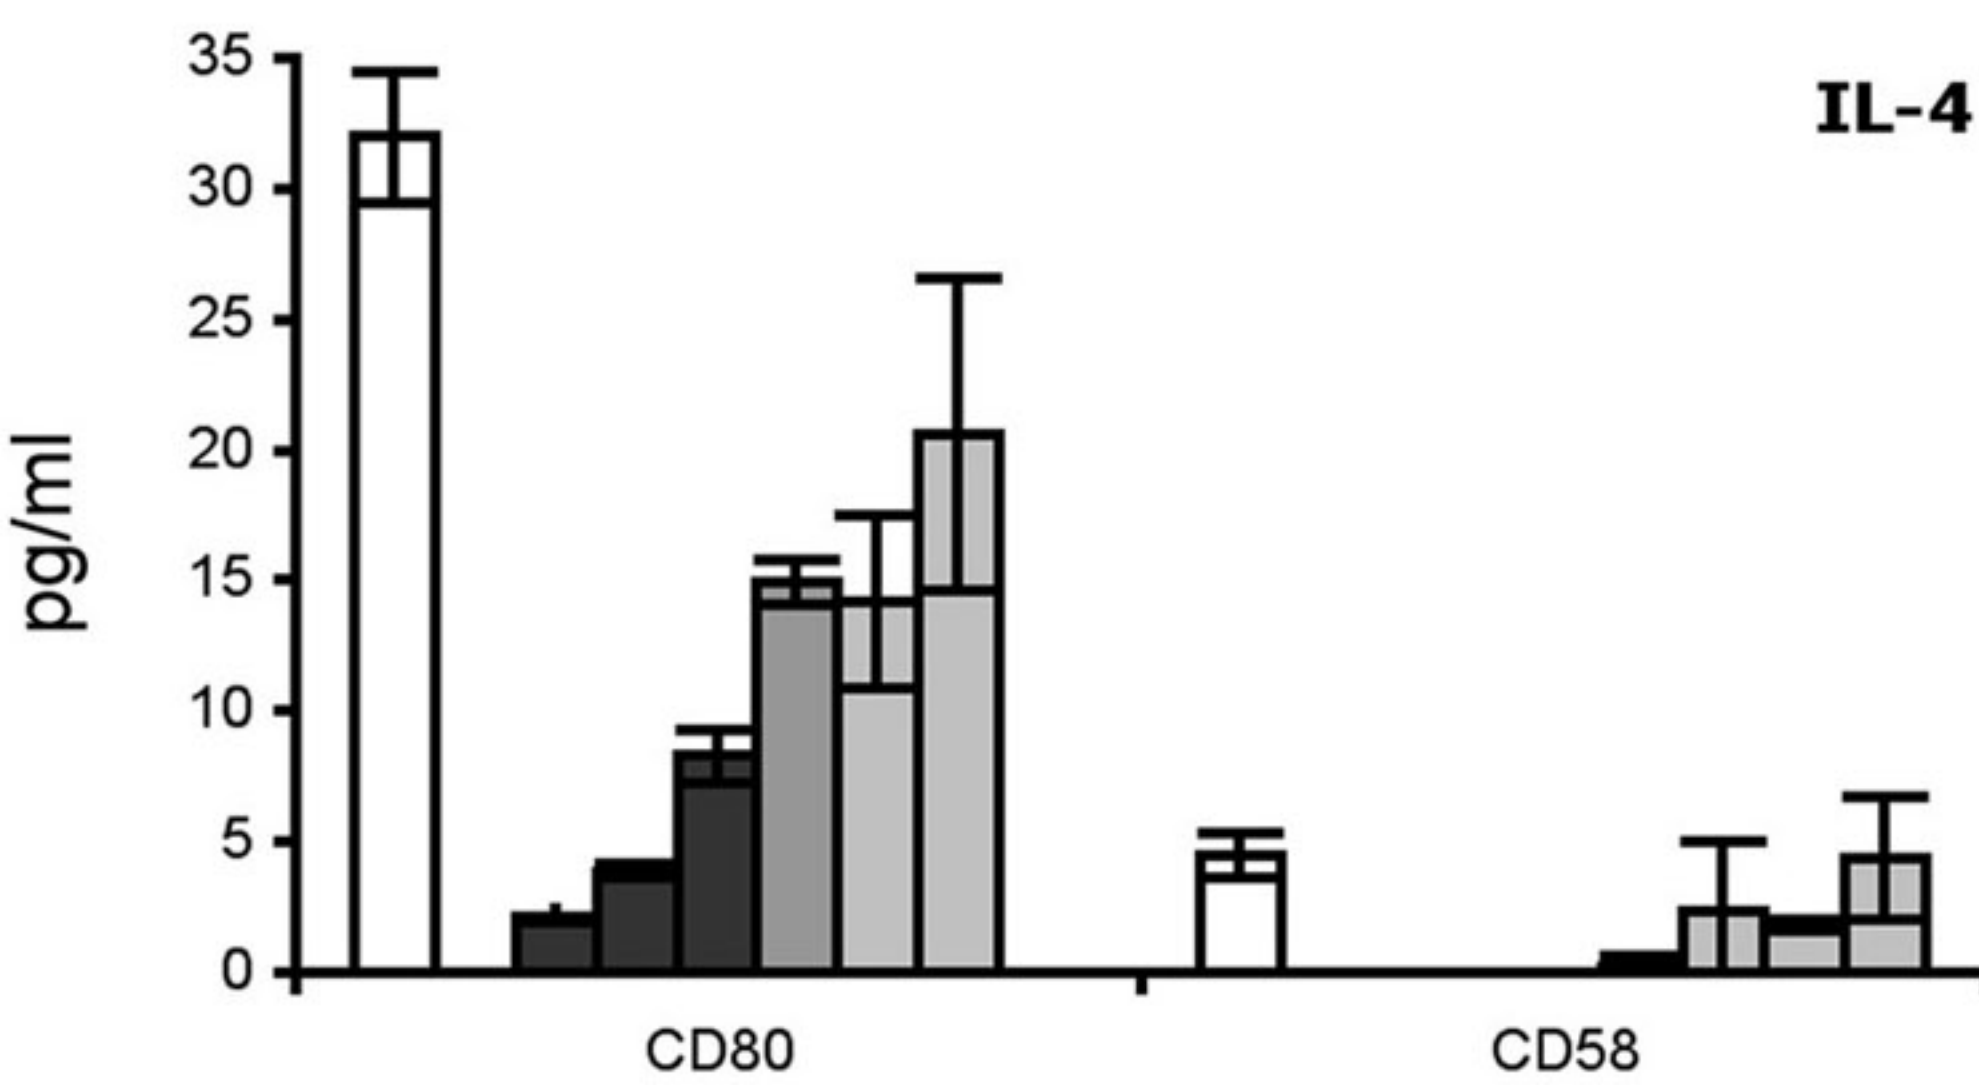

Supplement: mmc1.pdf [file mmc1.pdf]

# CD4<sup>+</sup> T cells

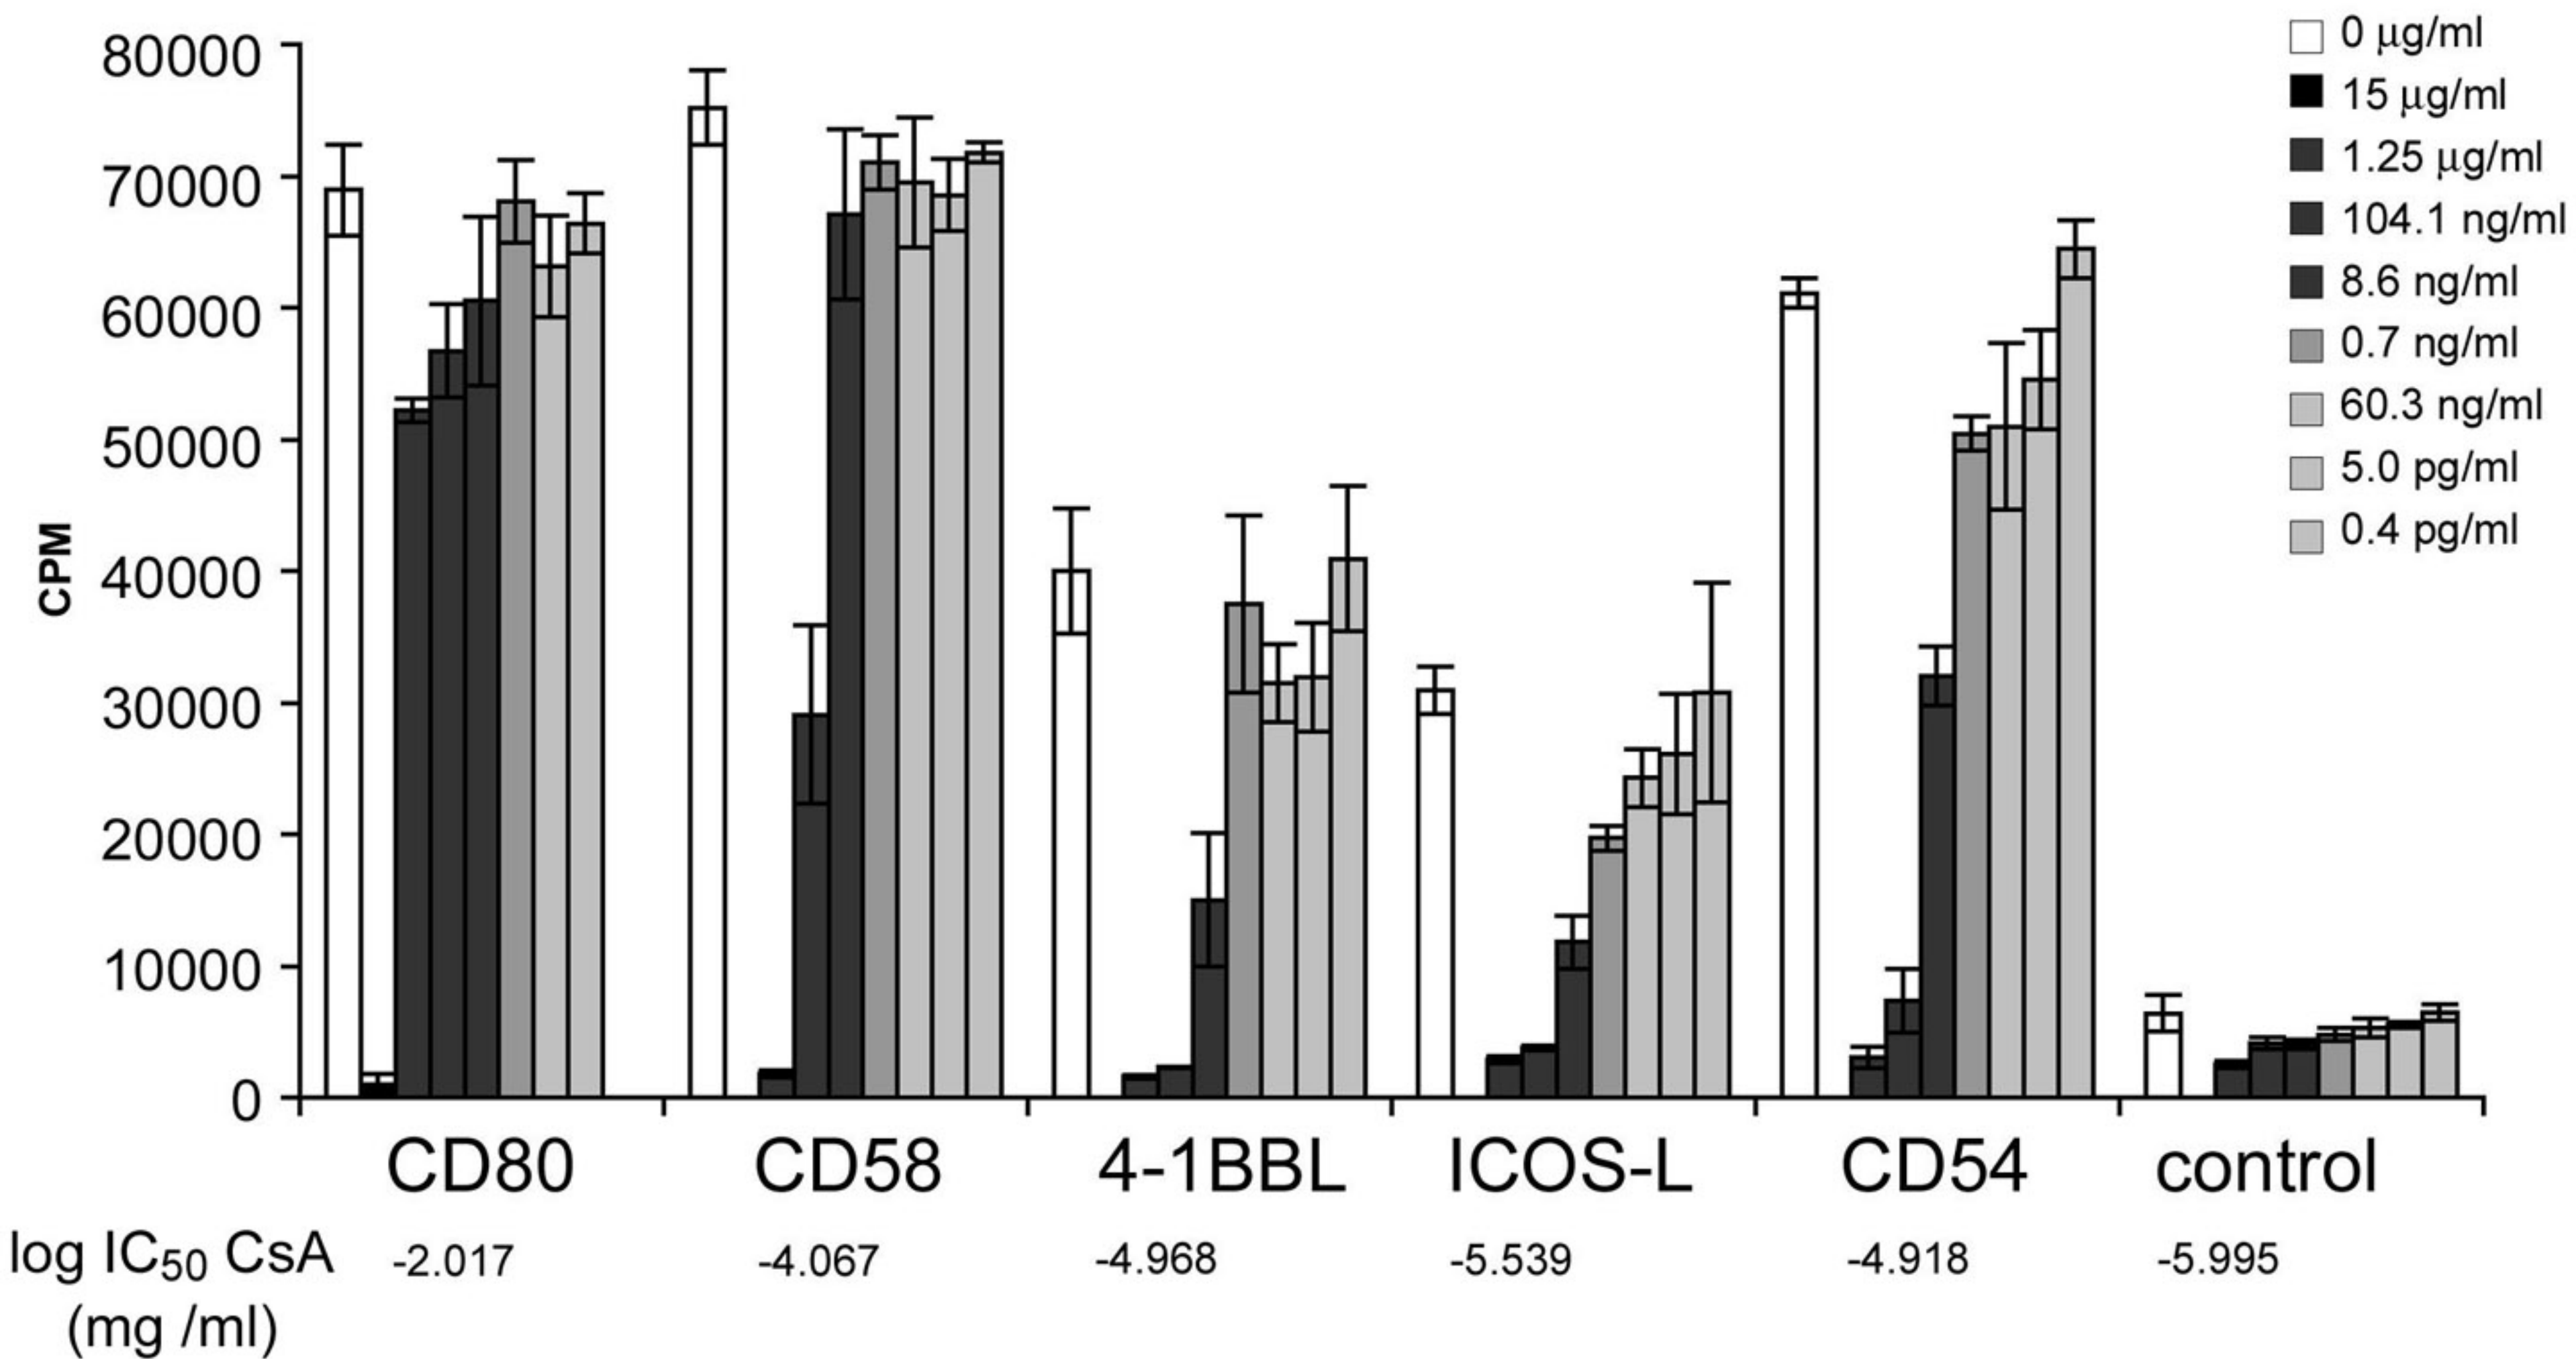

# CD8<sup>+</sup> T cells

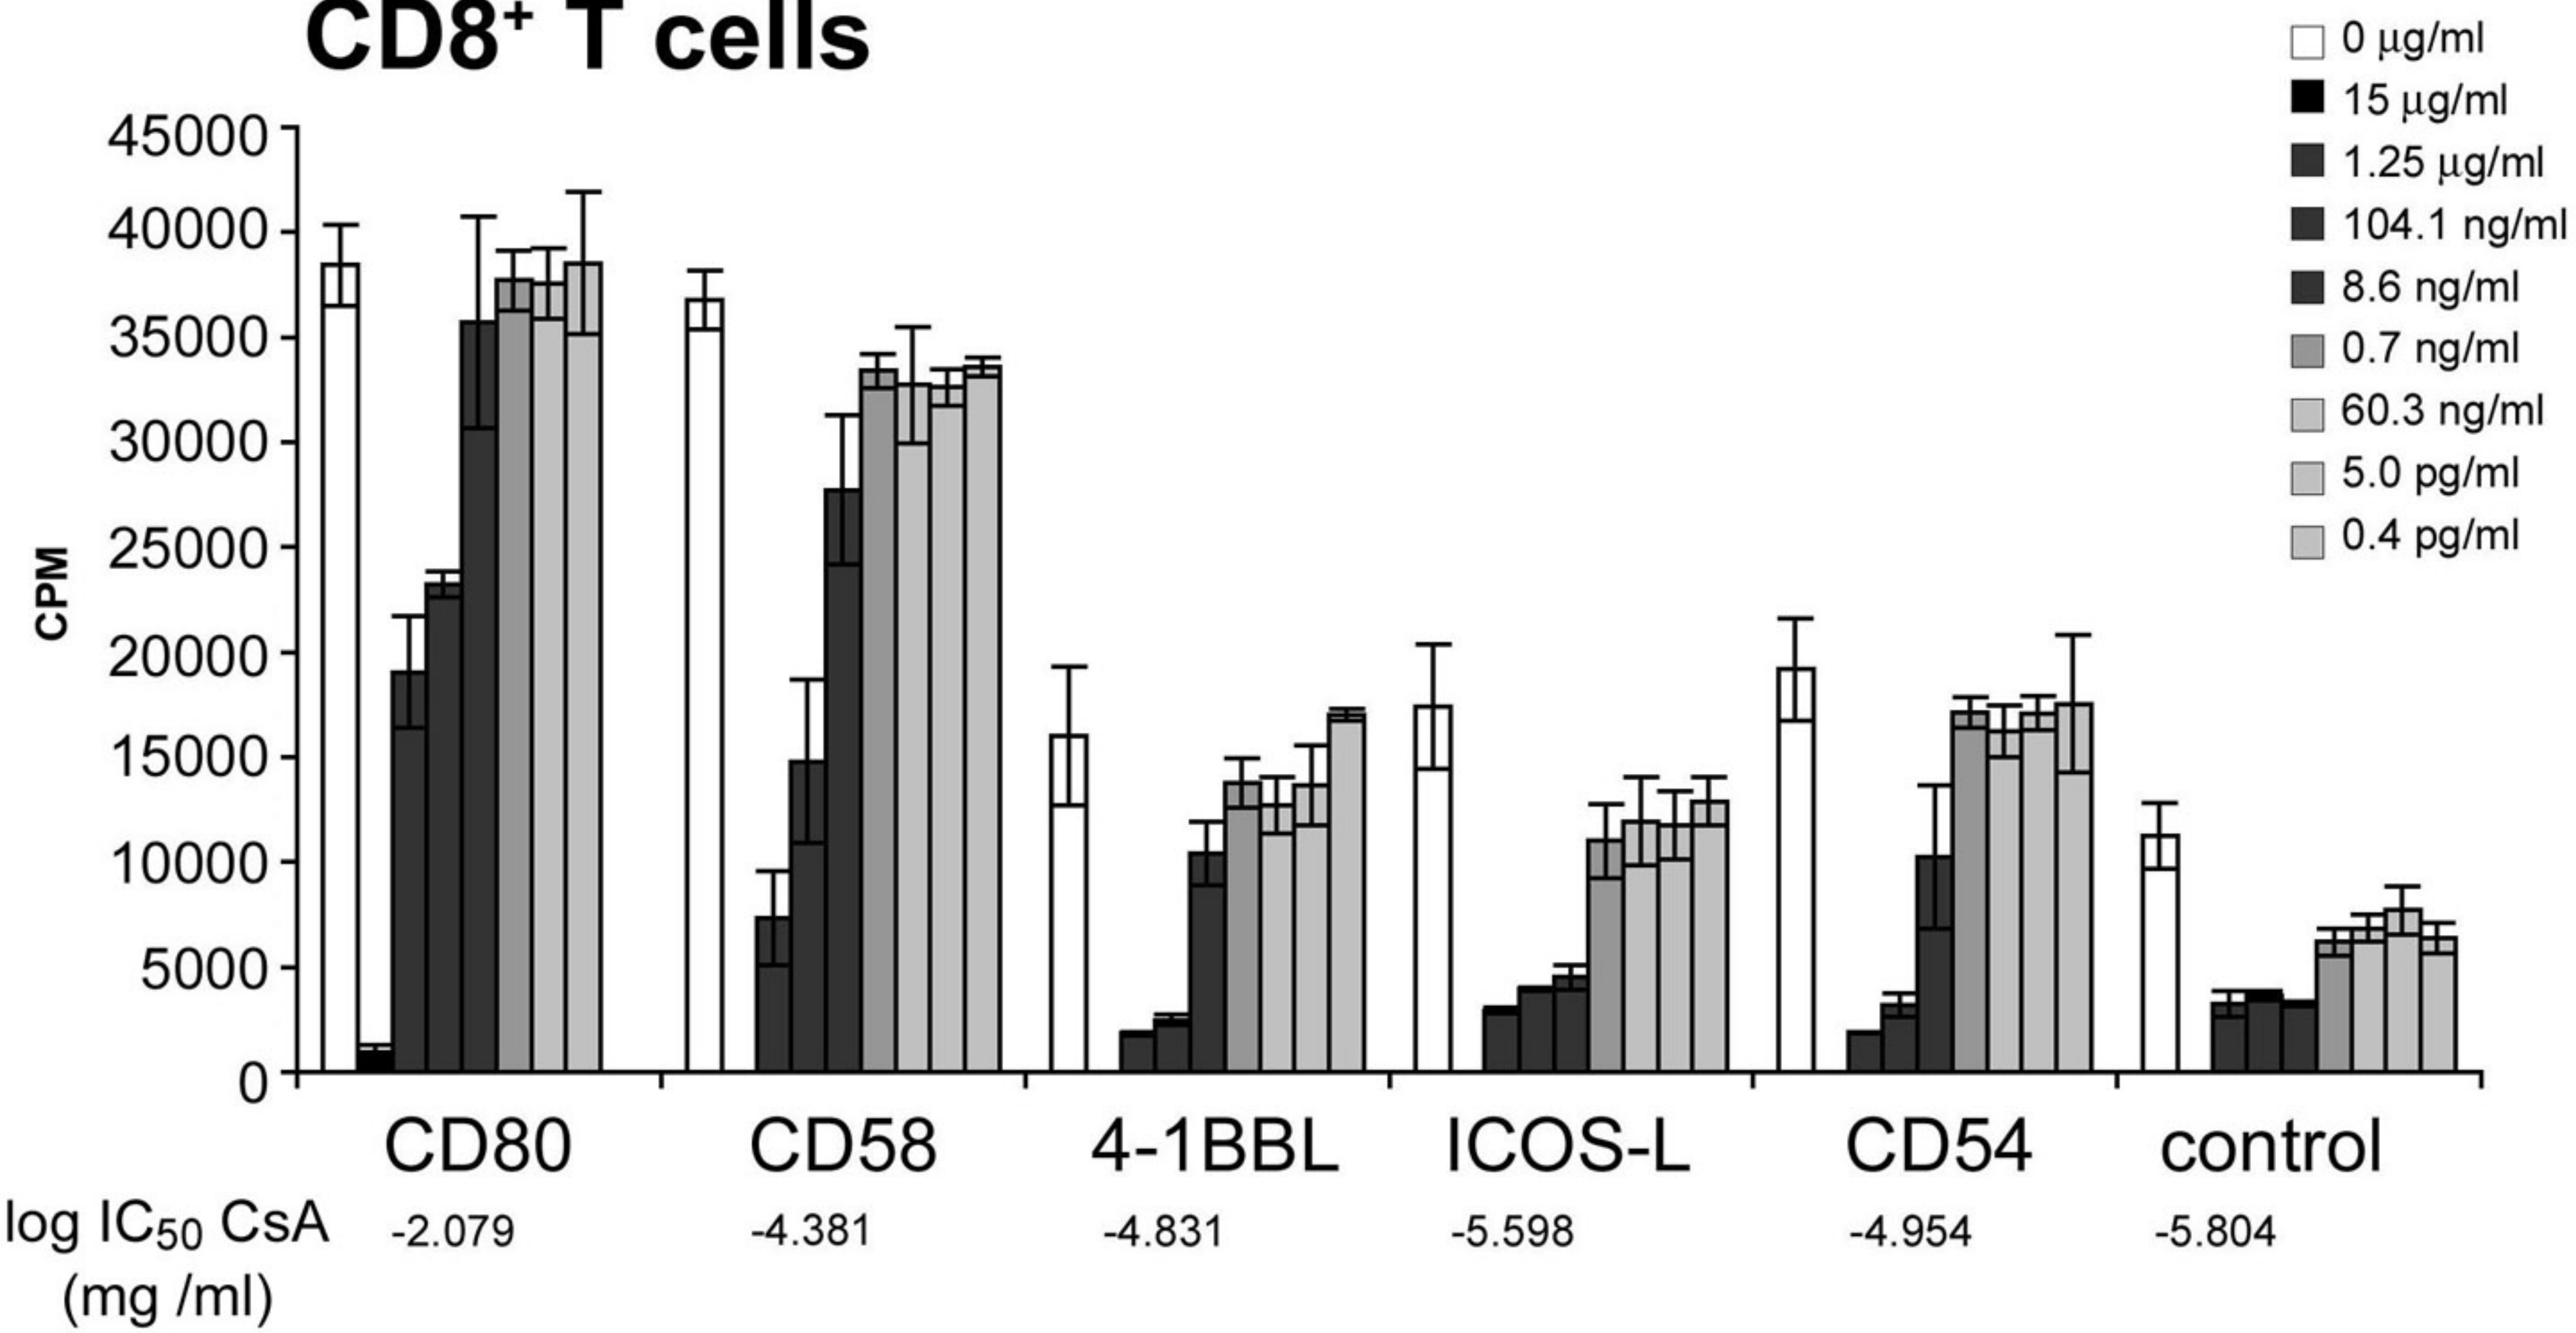

Supplement: mmc2.pdf [file mmc2.pdf]

**A**

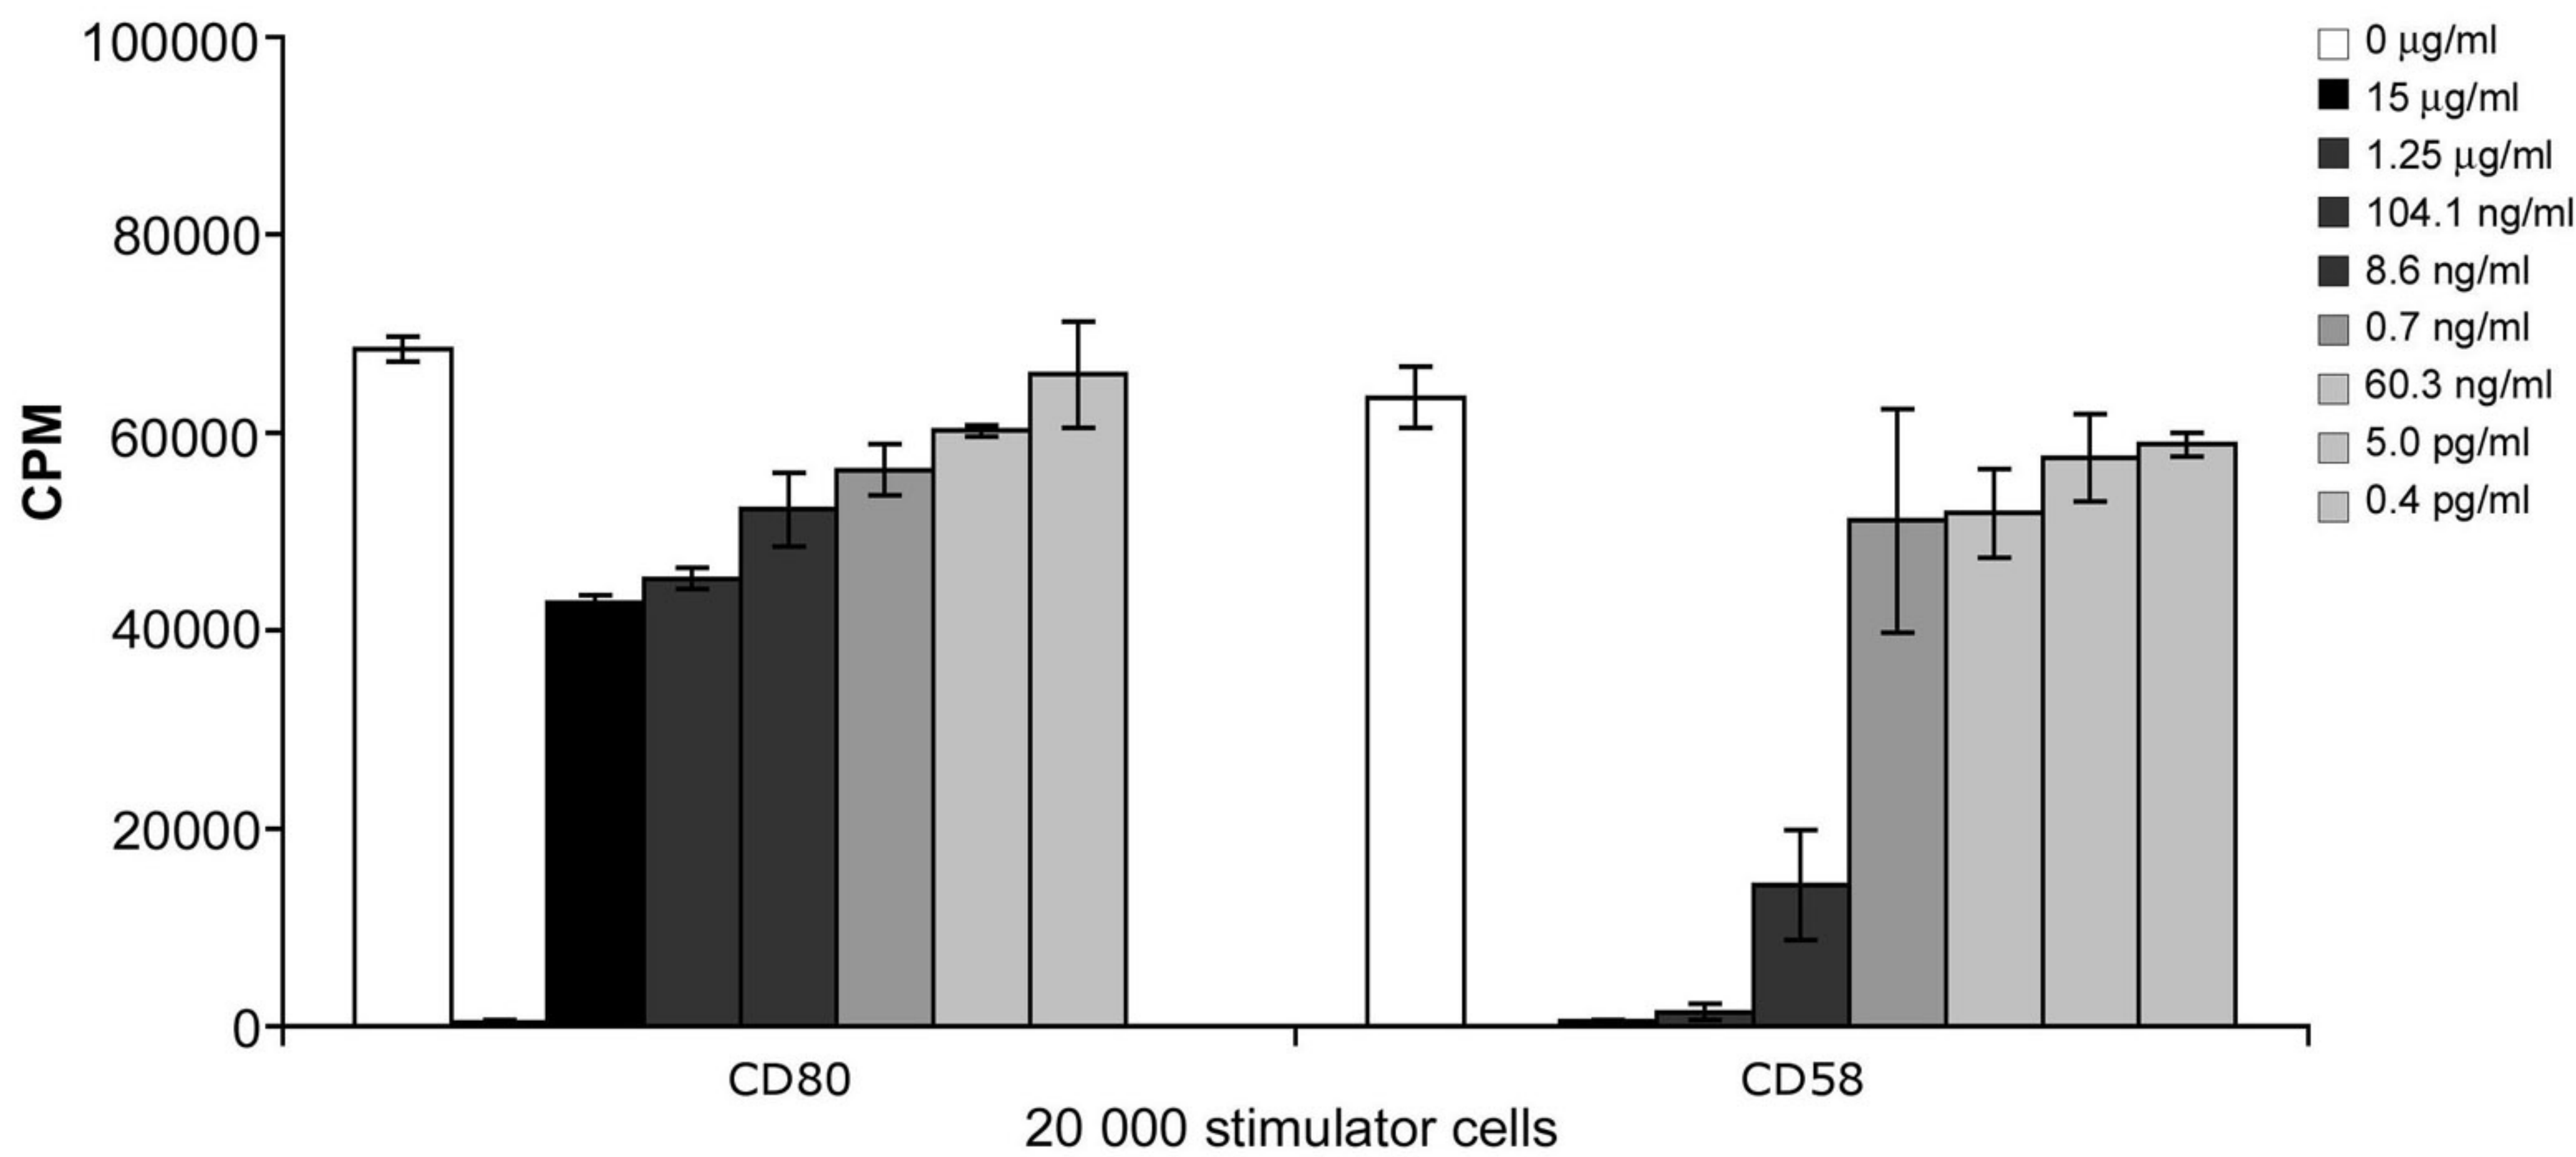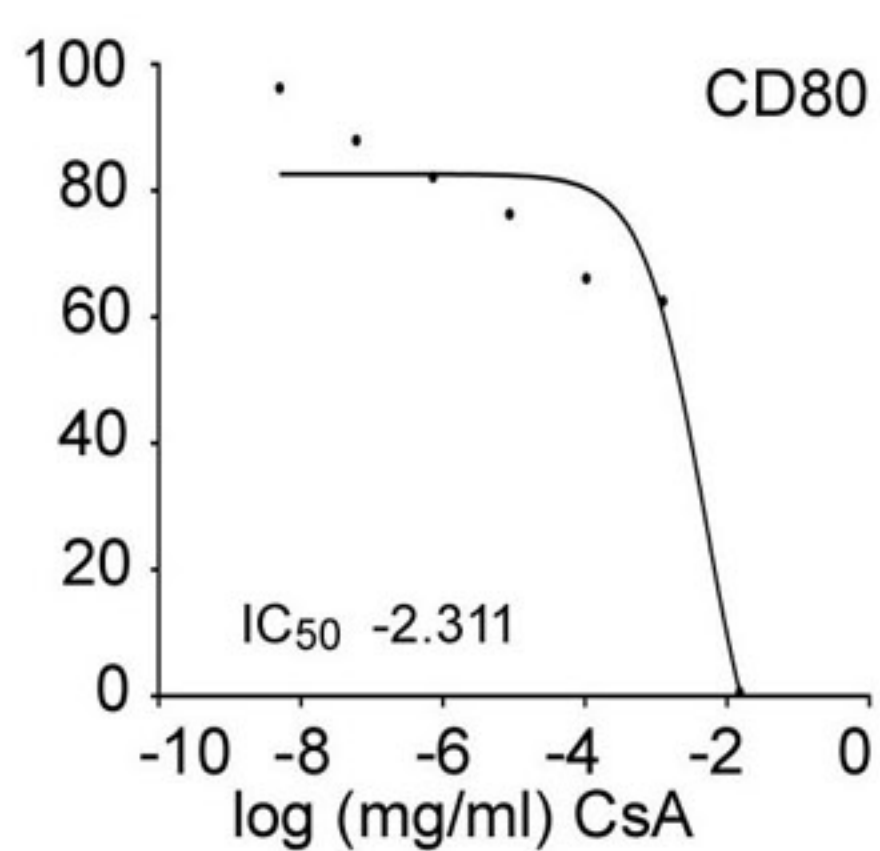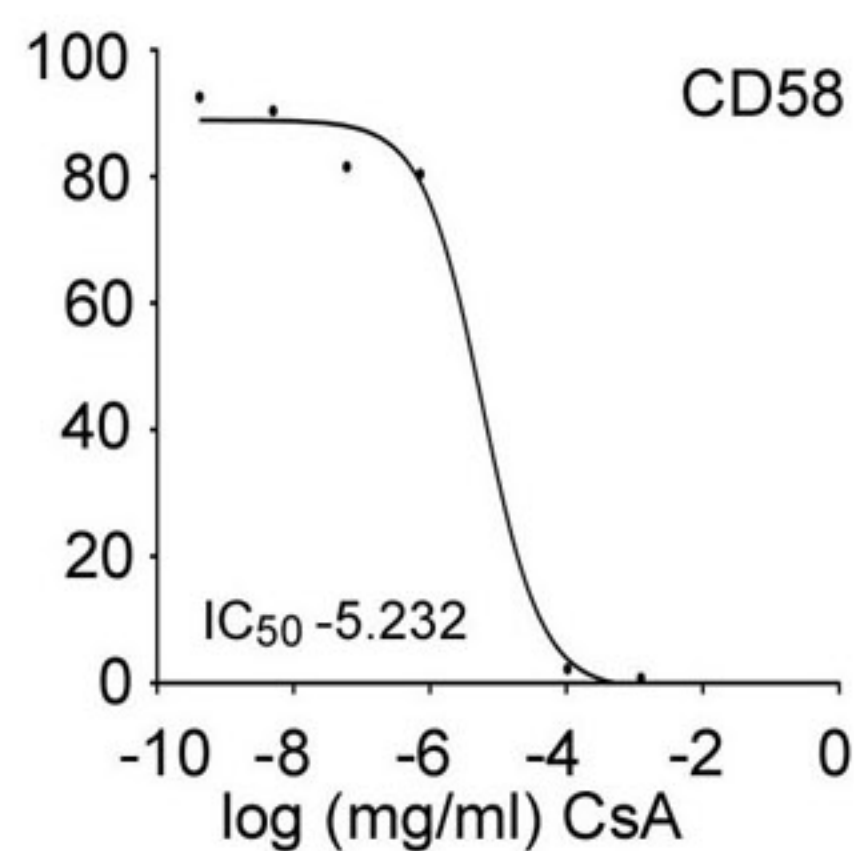

**B**

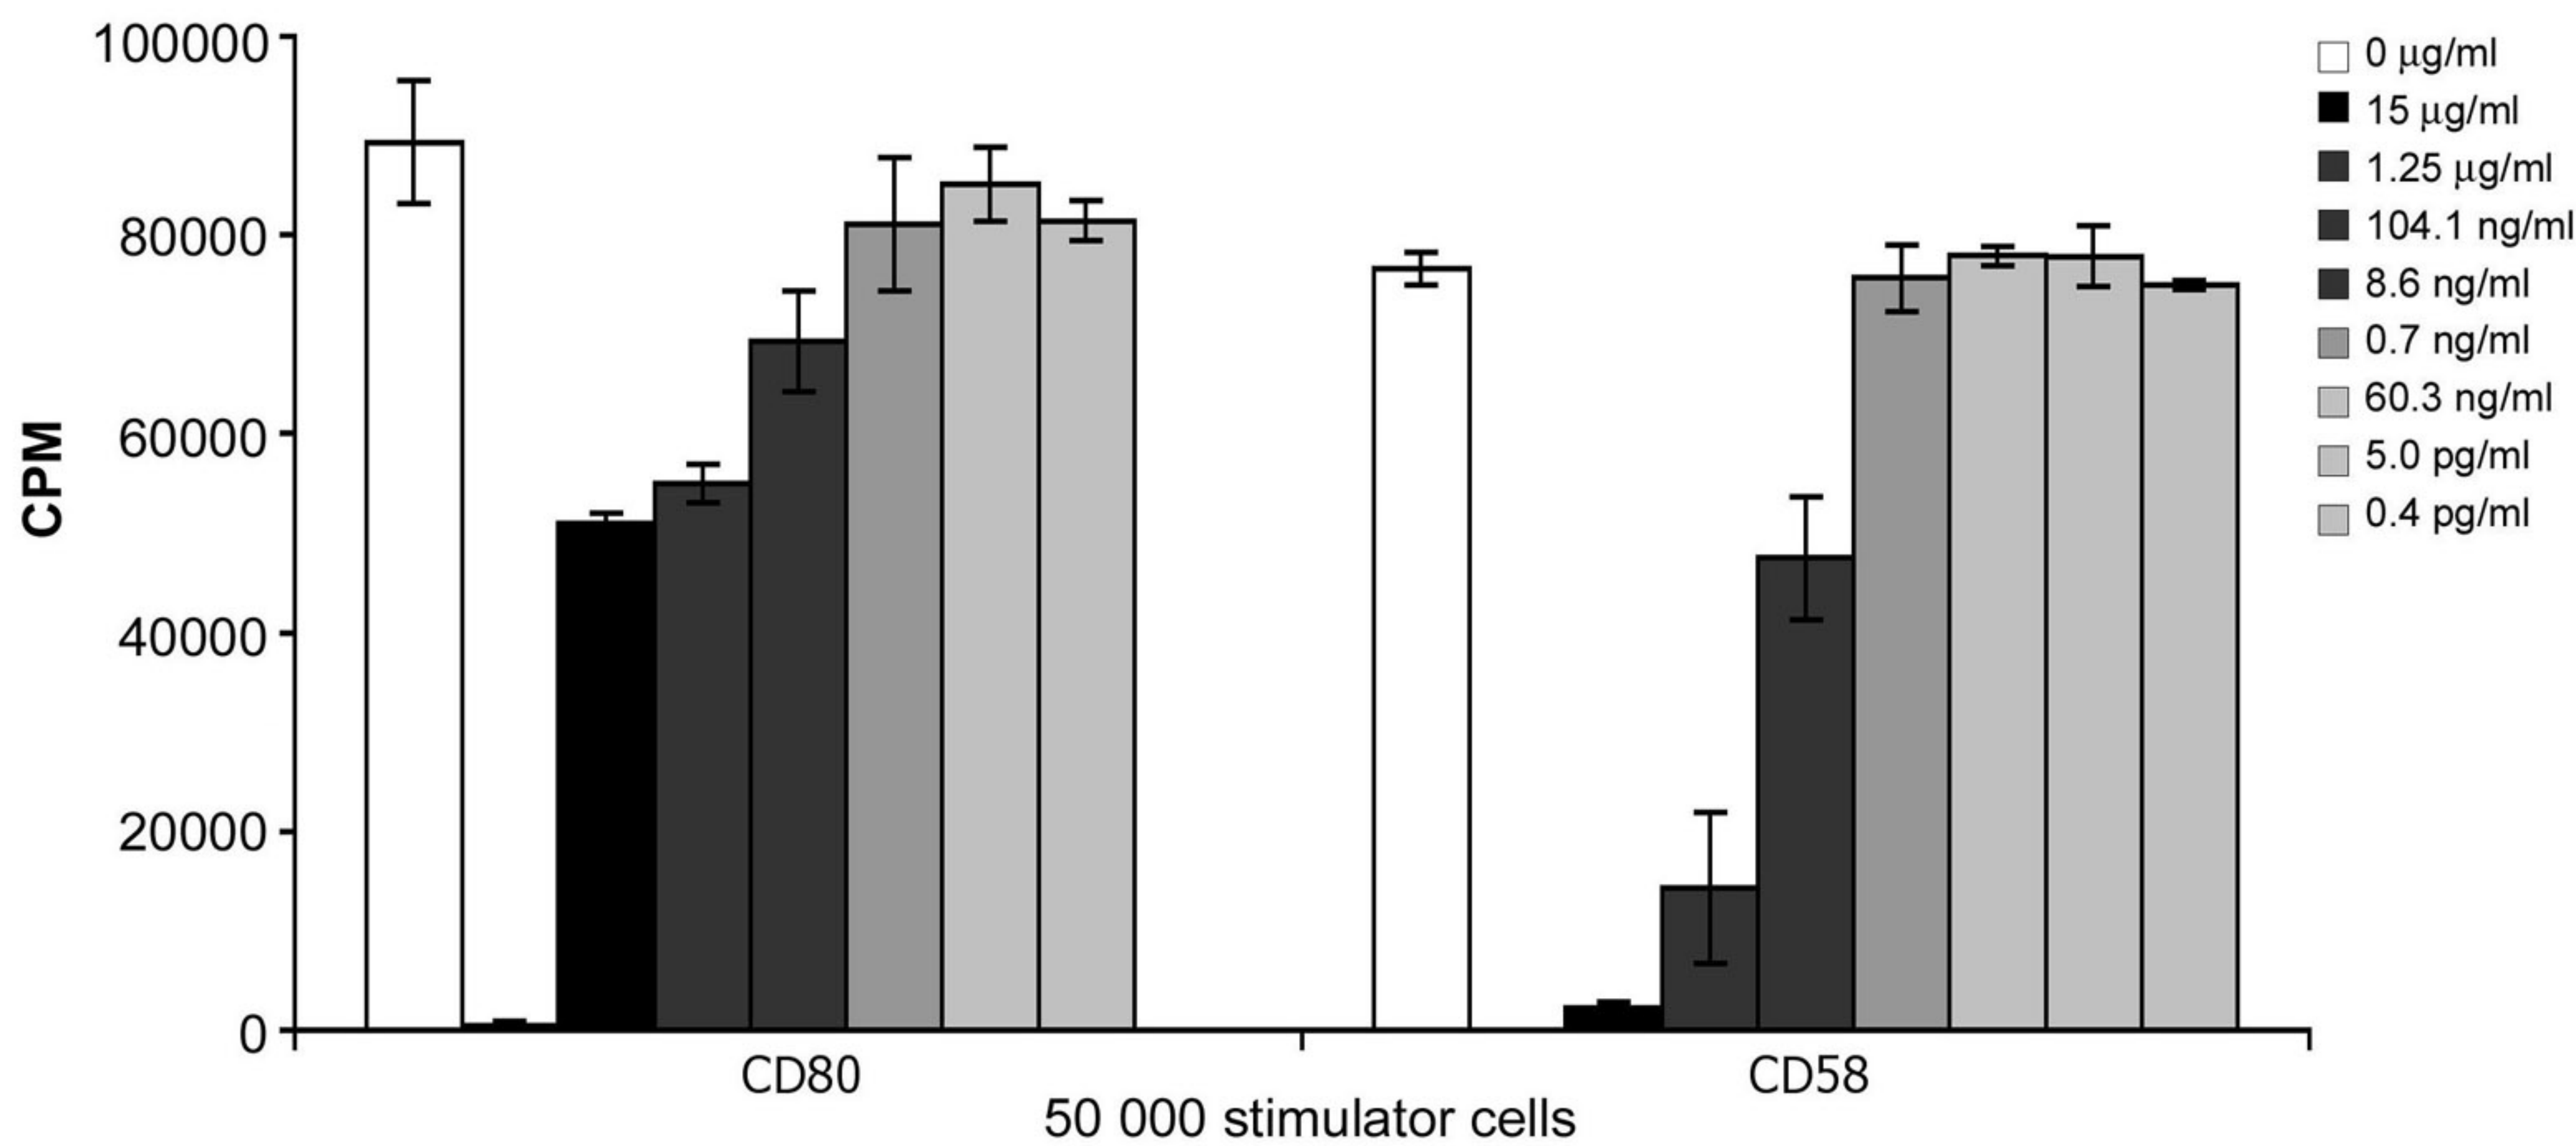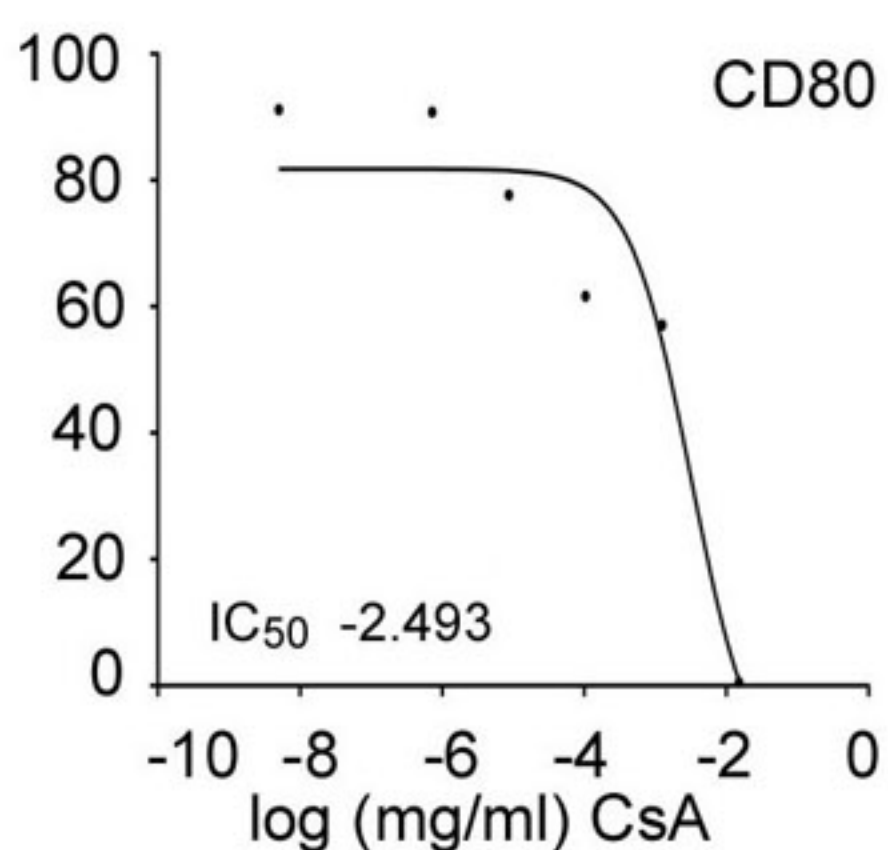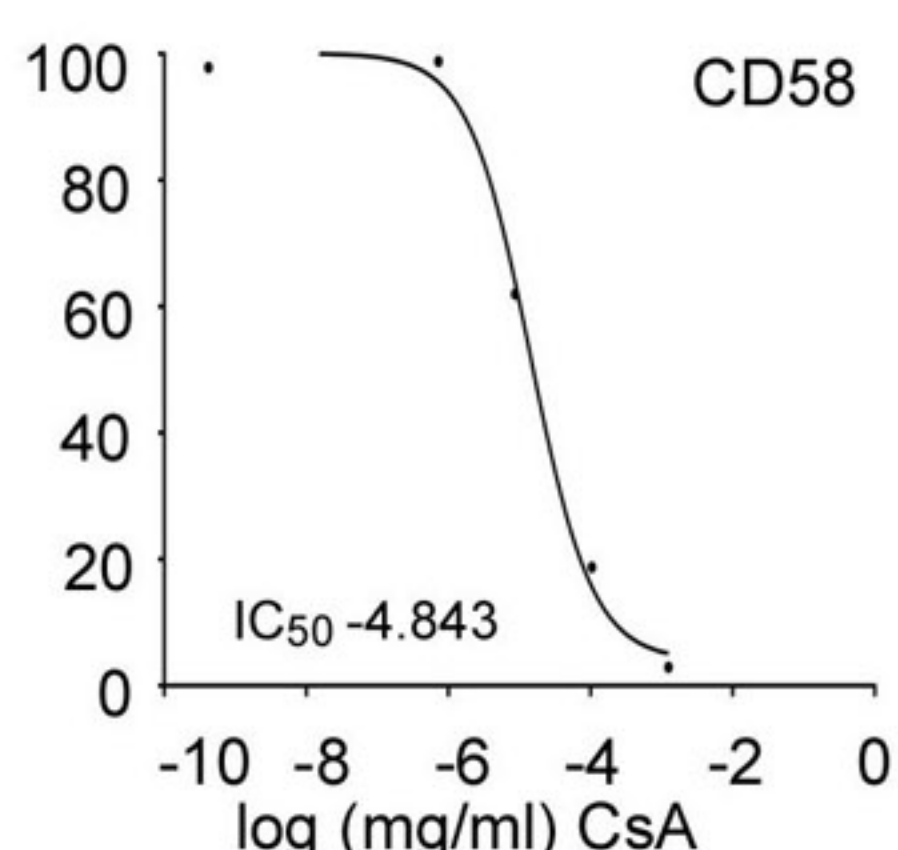

Supplement: mmc3.pdf [file mmc3.pdf]
